# Supplementary material for: Inflammation Anergy in Human Intestinal Macrophages Is Due to Smad-induced IκBα Expression and NF-κB Inactivation
Source: PubMed Central journal article supplement — J Biol Chem. 2010 Apr 13;285(25):19593–604. doi: 10.1074/jbc.M109.069955 (PMC2885238; doi:10.1074/jbc.m109.069955), 2010-04-13

## Supplementary Figure Legends

**Supplementary Figure 1. Monocyte-derived macrophages display reduced pro-inflammatory function, but not inflammation anergy, over time.** (A) Monocyte-derived macrophages exposed to rough LPS (*S. abortus*), smooth LPS (*E. coli*) and flagellin (*S. Typhimurium*) released significantly lower levels of TNF- $\alpha$  over time, reaching minimal levels on day 5. Values represent mean  $\pm$  S.E. of triplicate wells from a representative experiment ( $n=4$ ) ( $p<0.05^*$ ;  $p<0.01^{**}$ ;  $p<0.001^{***}$  for inducible TNF- $\alpha$  within the stimuli at different timepoints). (B) Monocyte-derived macrophage expression of CD14, TLR4 and TLR5 decreased over the same time-course, but surface levels were still detectable on day 5. Data is from a representative experiment ( $n=3$ ).

**Supplementary Figure 2. TLR4 and MD-2 gene transfection of intestinal macrophages.** Low numbers of intestinal macrophages expressed TLR4 and MD-2 following transfection with TLR4 and MD-2 (left panel) but not after transfection with vector alone (middle panel). Quadrant limits were set at the 1% cursor, using appropriate isotype controls (right panel). Data are from a representative experiment ( $n=3$ ).

**Supplementary Figure 3. Stromal factors down-regulate NF- $\kappa$ B translocation in blood monocytes.** (A) Blood monocytes from the same experiment in Figure 6B were treated with S-CM (500  $\mu$ g/mL; bottom right panel) and analyzed for NF- $\kappa$ B nuclear translocation by immunofluorescence and confocal microscopy. NF- $\kappa$ B in the S-CM-treated monocytes localized predominantly to the cytoplasm. (B) NF- $\kappa$ B in monocytes treated with (a) medium alone or (b) M-CSF (10 ng/mL) plus either rhTGF- $\beta$  (50 pg/mL) or S-CM plus irrelevant mouse antibody also localized predominantly in the cytoplasm. NF- $\kappa$ B in monocytes stimulated with M-CSF alone localized predominantly in the nucleus.

# Supplementary Figure 1

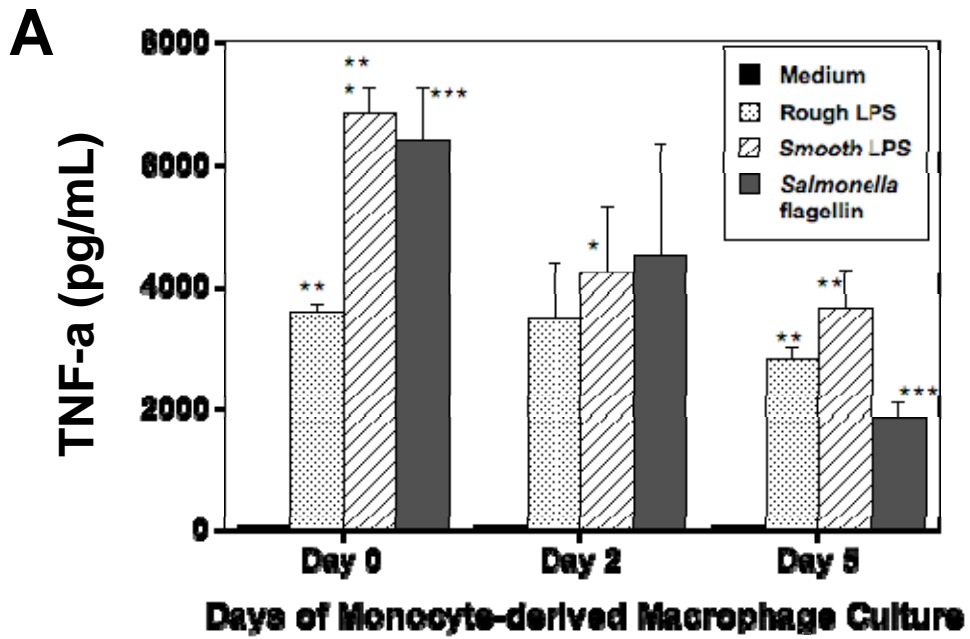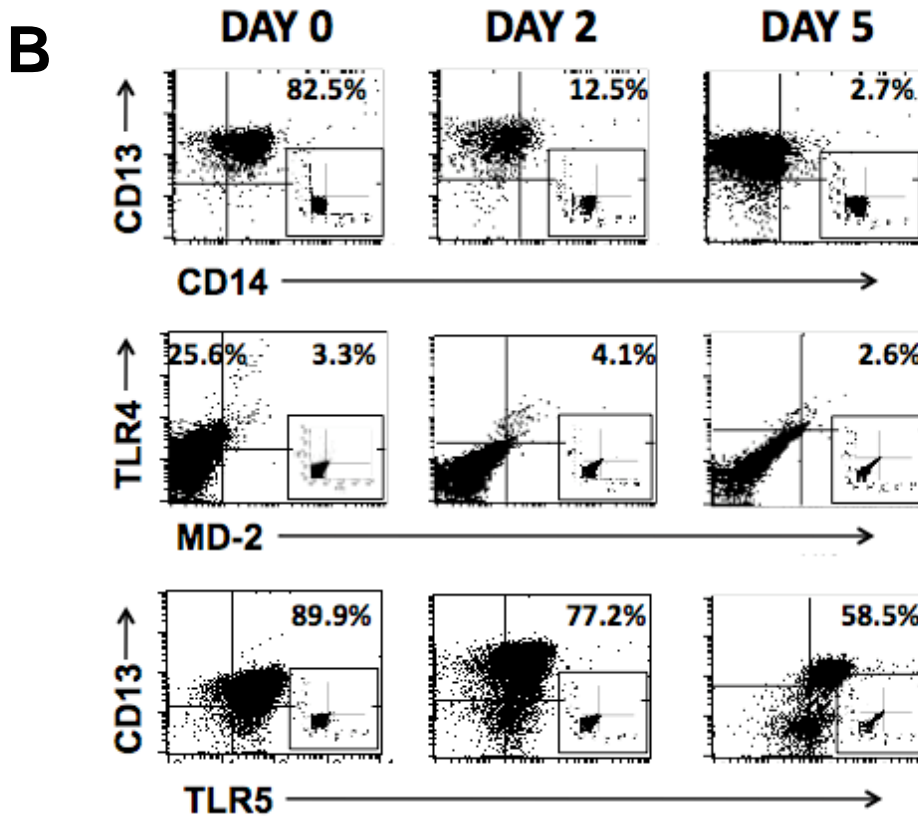

## Supplementary Figure 2

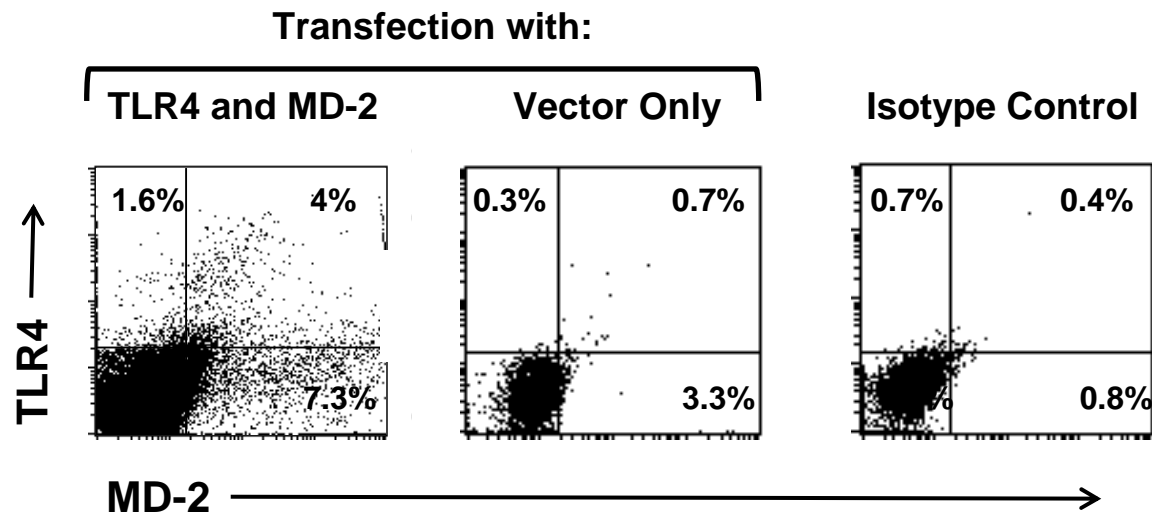

# Supplementary Figure 3

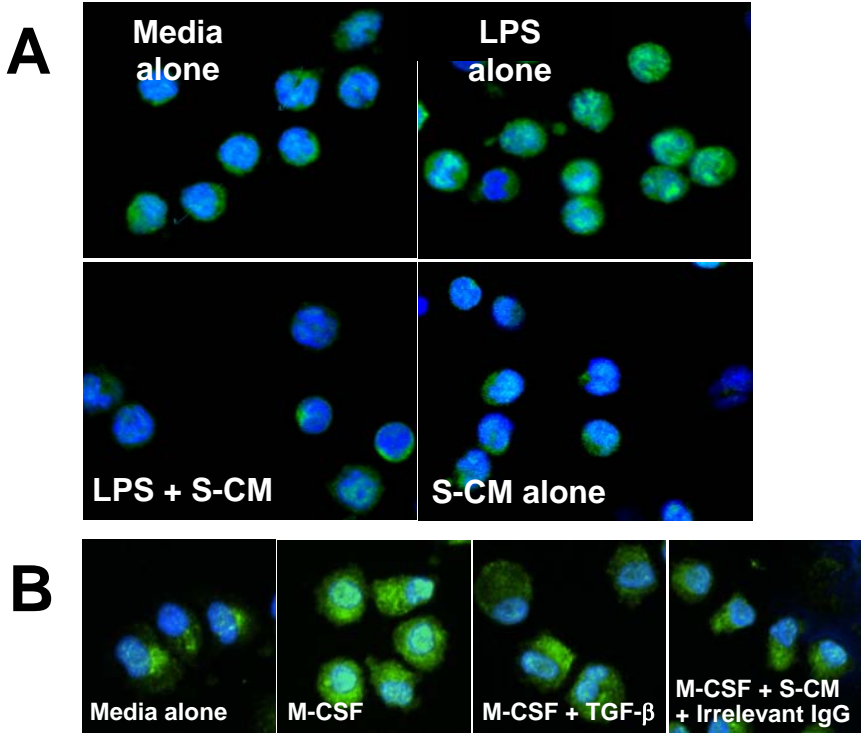

Supplement: supp_M109.069955_jbc.M109.069955-1.pdf [file supp_M109.069955_jbc.M109.069955-1.pdf]
